# Supplementary material
Source: publisher site journal article supplement (https://www.dovepress.com/article/421841)
Supplement: Supplementary file 1 [file get_supplementary_file.php]

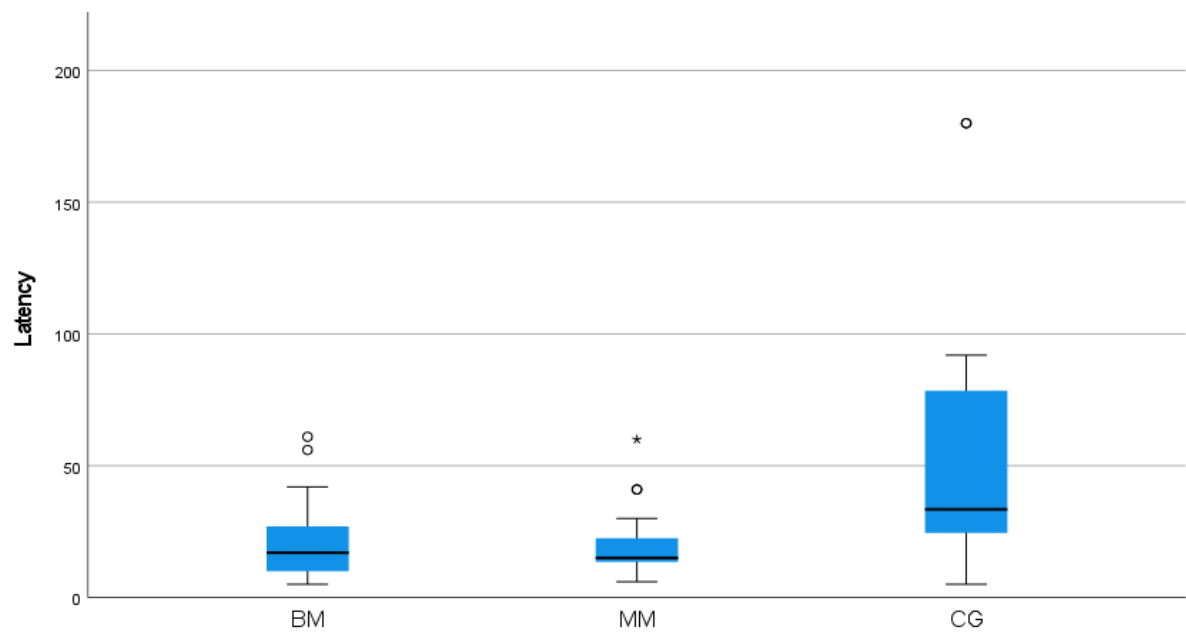

Figure S1: Latency of pain onset in seconds for the three groups

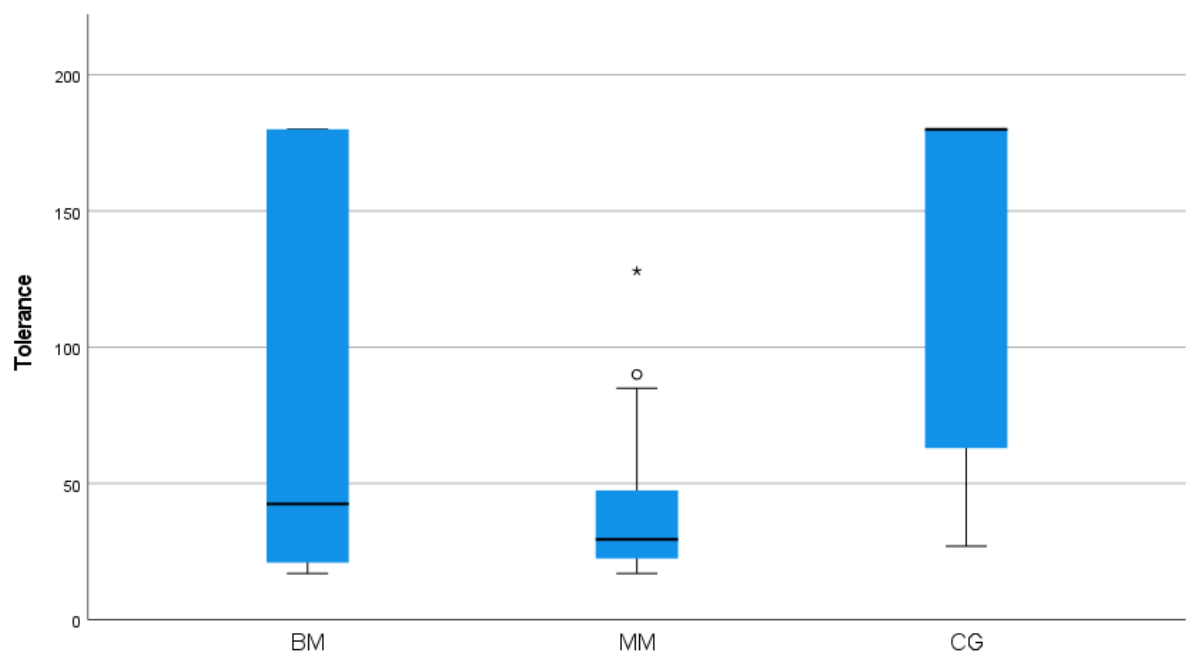

Figure S2: Duration of immersion of hand in ice water in seconds for the three groups

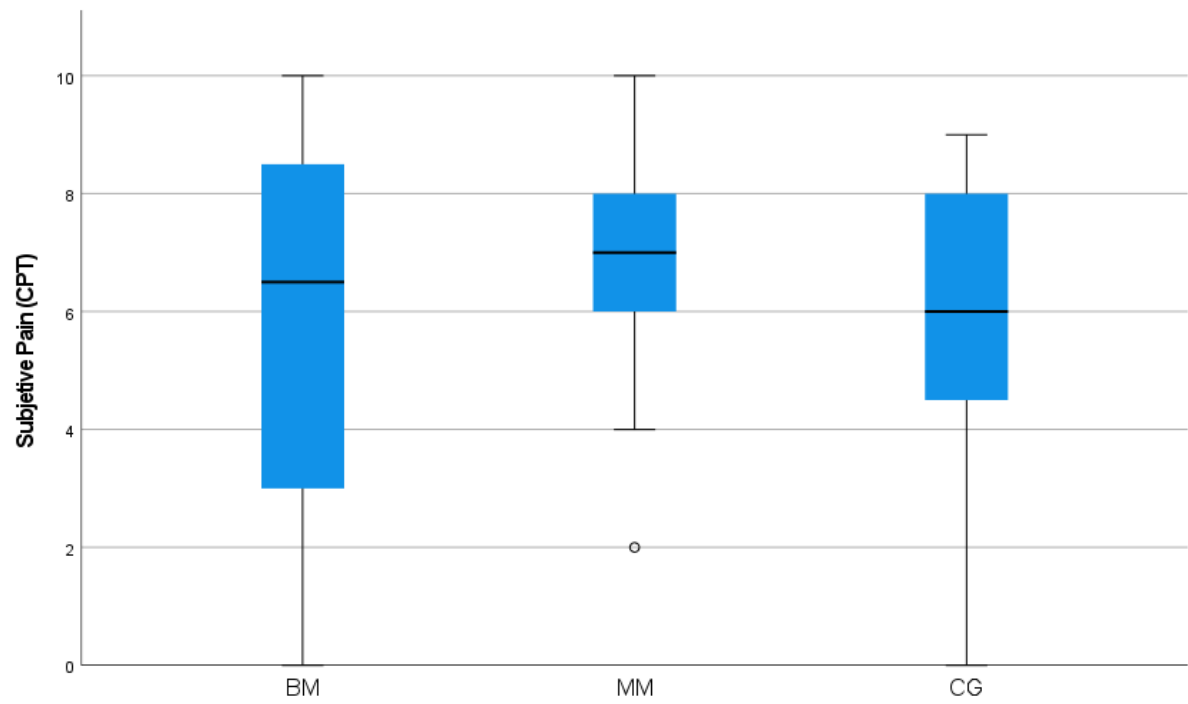

Figure S3: Pain intensity (NRS) immediately after withdrawal of the hand for the three groups
